# Supplementary material for: Efficacy of Nirmatrelvir/ritonavir in reducing the risk of severe outcome in patients with SARS-CoV-2 infection: a real-life full-matched case-control study (SAVALO Study)
Source: bioRxiv or medRxiv preprint supplement (doi:10.1101/2024.06.07.24307681), 2024-06-07
Supplement: Supplementary file [file media-3.pdf]

**Supplementary Table 1.** Baseline features of pre-matched sample (N=1607) according to vaccination status.

|                                    | <b>Vaccination</b>   | <b>No vaccination</b> | <b>p-value</b> |
|------------------------------------|----------------------|-----------------------|----------------|
| N                                  | 1504                 | 103                   |                |
| Male sex (%)                       | 701 (46.6)           | 25 (24.3)             | <0.001         |
| Age (median, IQR)                  | 59.00 [47.00, 69.00] | 57.00 [44.50, 70.00]  | 0.889          |
| Serology status (%)                |                      |                       | 0.185          |
| - N/A                              | 1256 (83.5)          | 93 (90.3)             |                |
| - positive                         | 163 (10.8)           | 6 (5.8)               |                |
| - negative                         | 85 (5.7)             | 4 (3.9)               |                |
| Diabetes (%)                       | 135 (9.0)            | 6 (5.8)               | 0.361          |
| Hypertension (%)                   | 248 (20.6)           | 7 (7.8)               | 0.005          |
| Chronic heart disease (%)          | 222 (14.8)           | 9 (8.7)               | 0.123          |
| COPD (%)                           | 100 (6.6)            | 8 (7.8)               | 0.814          |
| CKD (%)                            | 31 (2.1)             | 0 (0.0)               | 0.271          |
| Obesity (%)                        | 207 (13.8)           | 8 (7.8)               | 0.114          |
| Liver disease (%)                  | 11 (0.7)             | 2 (1.9)               | 0.448          |
| Neurological disease (%)           | 53 (3.5)             | 5 (4.9)               | 0.669          |
| Immunodeficiency (%)               | 261 (17.4)           | 11 (10.7)             | 0.107          |
| Comorbidity score<br>(median, IQR) | 1.00 [0.00, 1.00]    | 0.00 [0.00, 1.00]     | 0.001          |
| MASS score (median,<br>IQR)        | 2.00 [0.00, 4.00]    | 0.00 [0.00, 2.50]     | 0.006          |
| Predominant variant (%)            |                      |                       | <0.001         |
| - omicron                          | 102 (6.8)            | 17 (16.5)             |                |
| - omicron_BA.1                     | 224 (14.9)           | 29 (28.2)             |                |
| - omicron_BA.2                     | 408 (27.1)           | 16 (15.5)             |                |
| - omicron_BA.5                     | 760 (50.5)           | 40 (38.8)             |                |
| - omicron_BQ.1                     | 5 (0.3)              | 0 (0.0)               |                |
| - omicron_XBB.1.<br>5              | 5 (0.3)              | 1 (1.0)               |                |

*IQR: interquartile range; COPD: chronic obstructive pulmonary disease; CKD: chronic kidney disease*
